# Supplementary material for: DEC2 expression is positively correlated with HIF-1 activation and the invasiveness of human osteosarcomas
Source: Springer Nature journal article supplement (doi:10.1186/s13046-015-0135-8), 2015-02-27
Supplement: MOESM1 [file 9777832]

**Supplementary Table: Primers Used in qRT-PCR**

| <b>Name</b>    | <b>Sequence</b>                 |
|----------------|---------------------------------|
| DEC2           | 5'-CGAGACGACACCAAGGATACC-3'     |
|                | 5'-TTCTGATGCTGTTGCTCGGT-3'      |
| HIF-1 $\alpha$ | 5'-GCCAGACGATCATGCAGCTA-3'      |
|                | 5'-ATCCATTGATTGCCCCAGCA-3'      |
| ANGPTL4        | 5'-ACCTCAGATGGAGGCTGGAC-3'      |
|                | 5'-CCCGTGATGCTATGCACCTT-3'      |
| VEGFA          | 5'-CTCCACCATGCCAAGTGGTC-3'      |
|                | 5'-GCAGTAGCTGCGCTGATAGA-3'      |
| HK2            | 5'-GCTGCAAGAGGAATGAGGCT-3'      |
|                | 5'-TGGCTACTTACAACCGAAGCA-3'     |
| PGK1           | 5'-TTGACCGAATCACCGACCTC-3'      |
|                | 5'-AGCAGCCTTAATCCTCTGGT-3'      |
| $\beta$ -Actin | 5'-GTCATTCCAAATATGAGATGCGT-3'   |
|                | 5'-GCATTACATAATTTACACGAAAGCA-3' |
