# Supplementary material for: DEC2 expression is positively correlated with HIF-1 activation and the invasiveness of human osteosarcomas
Source: Springer Nature journal article supplement (doi:10.1186/s13046-015-0135-8), 2015-02-27

**A**

Normoxia

Hypoxia

Migration

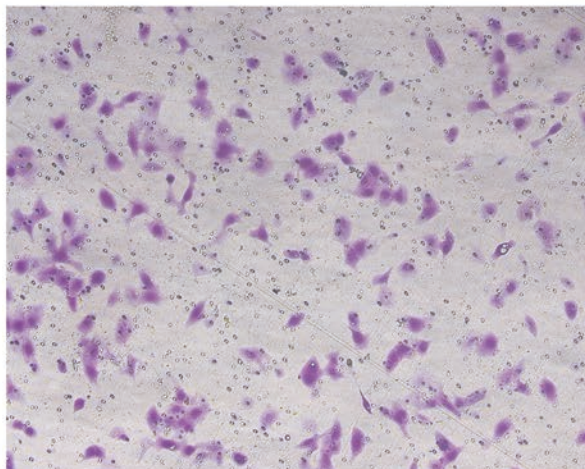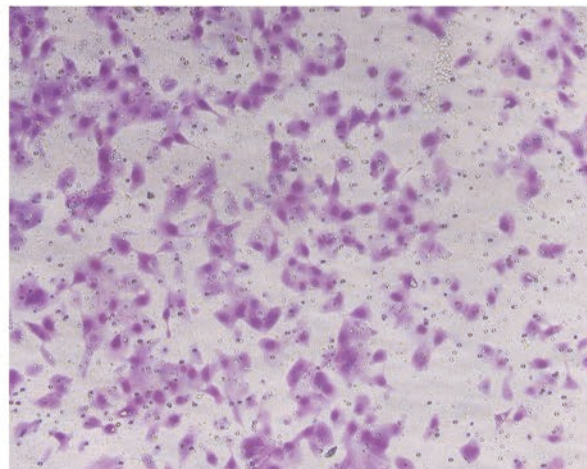

Invasion

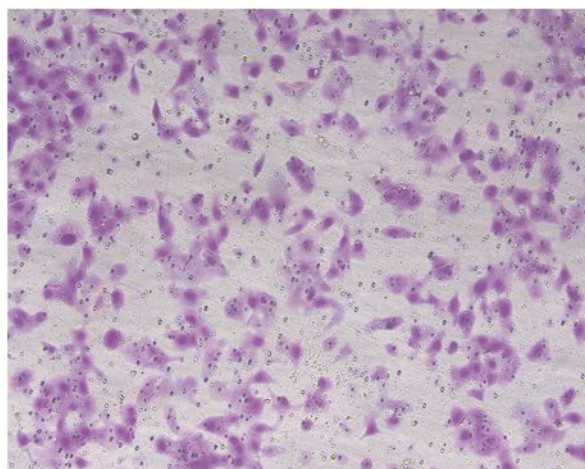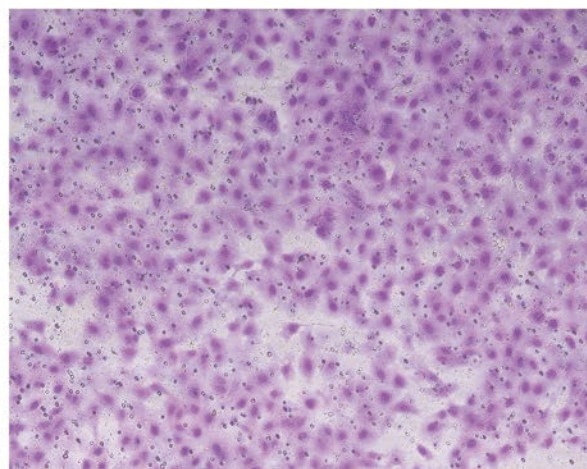**B**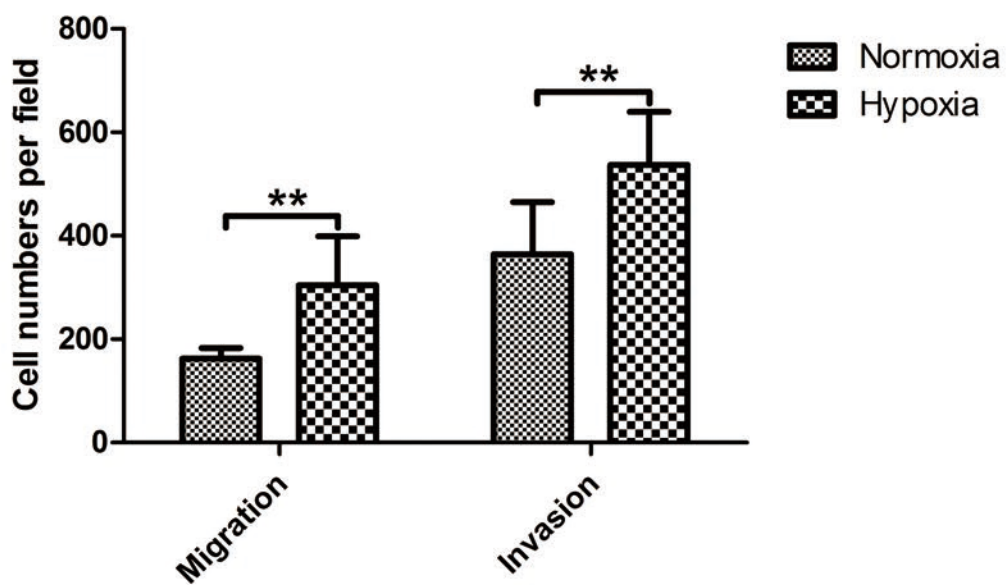

Supplement: MOESM3 [file 9777832]
