# Supplementary material for: DEC2 expression is positively correlated with HIF-1 activation and the invasiveness of human osteosarcomas
Source: Springer Nature journal article supplement (doi:10.1186/s13046-015-0135-8), 2015-02-27
Supplement: MOESM4 [file 9777832]

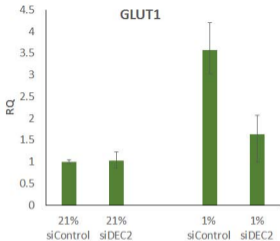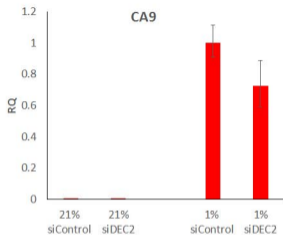

| GLUT1         | RQ    | RQ min | RQ max |
|---------------|-------|--------|--------|
| 21% siControl | 1     | 0.952  | 1.051  |
| 21% siDEC2    | 1.019 | 0.847  | 1.225  |
|               |       |        |        |
| 1% siControl  | 3.566 | 3.029  | 4.197  |
| 1% siDEC2     | 1.626 | 0.993  | 2.061  |

| CA9           | RQ    | RQ min | RQ max |
|---------------|-------|--------|--------|
| 21% siControl | NA    | NA     | NA     |
| 21% siDEC2    | NA    | NA     | NA     |
|               |       |        |        |
| 1% siControl  | 1     | 0.908  | 1.113  |
| 1% siDEC2     | 0.725 | 0.591  | 0.889  |
